# Supplementary figures and images for: New Remains of Camelus grattardi (Mammalia, Camelidae) from the Plio-Pleistocene of Ethiopia and the Phylogeny of the Genus
Source: Springer Nature journal article supplement (doi:10.1007/s10914-019-09489-2), 2019-12-12

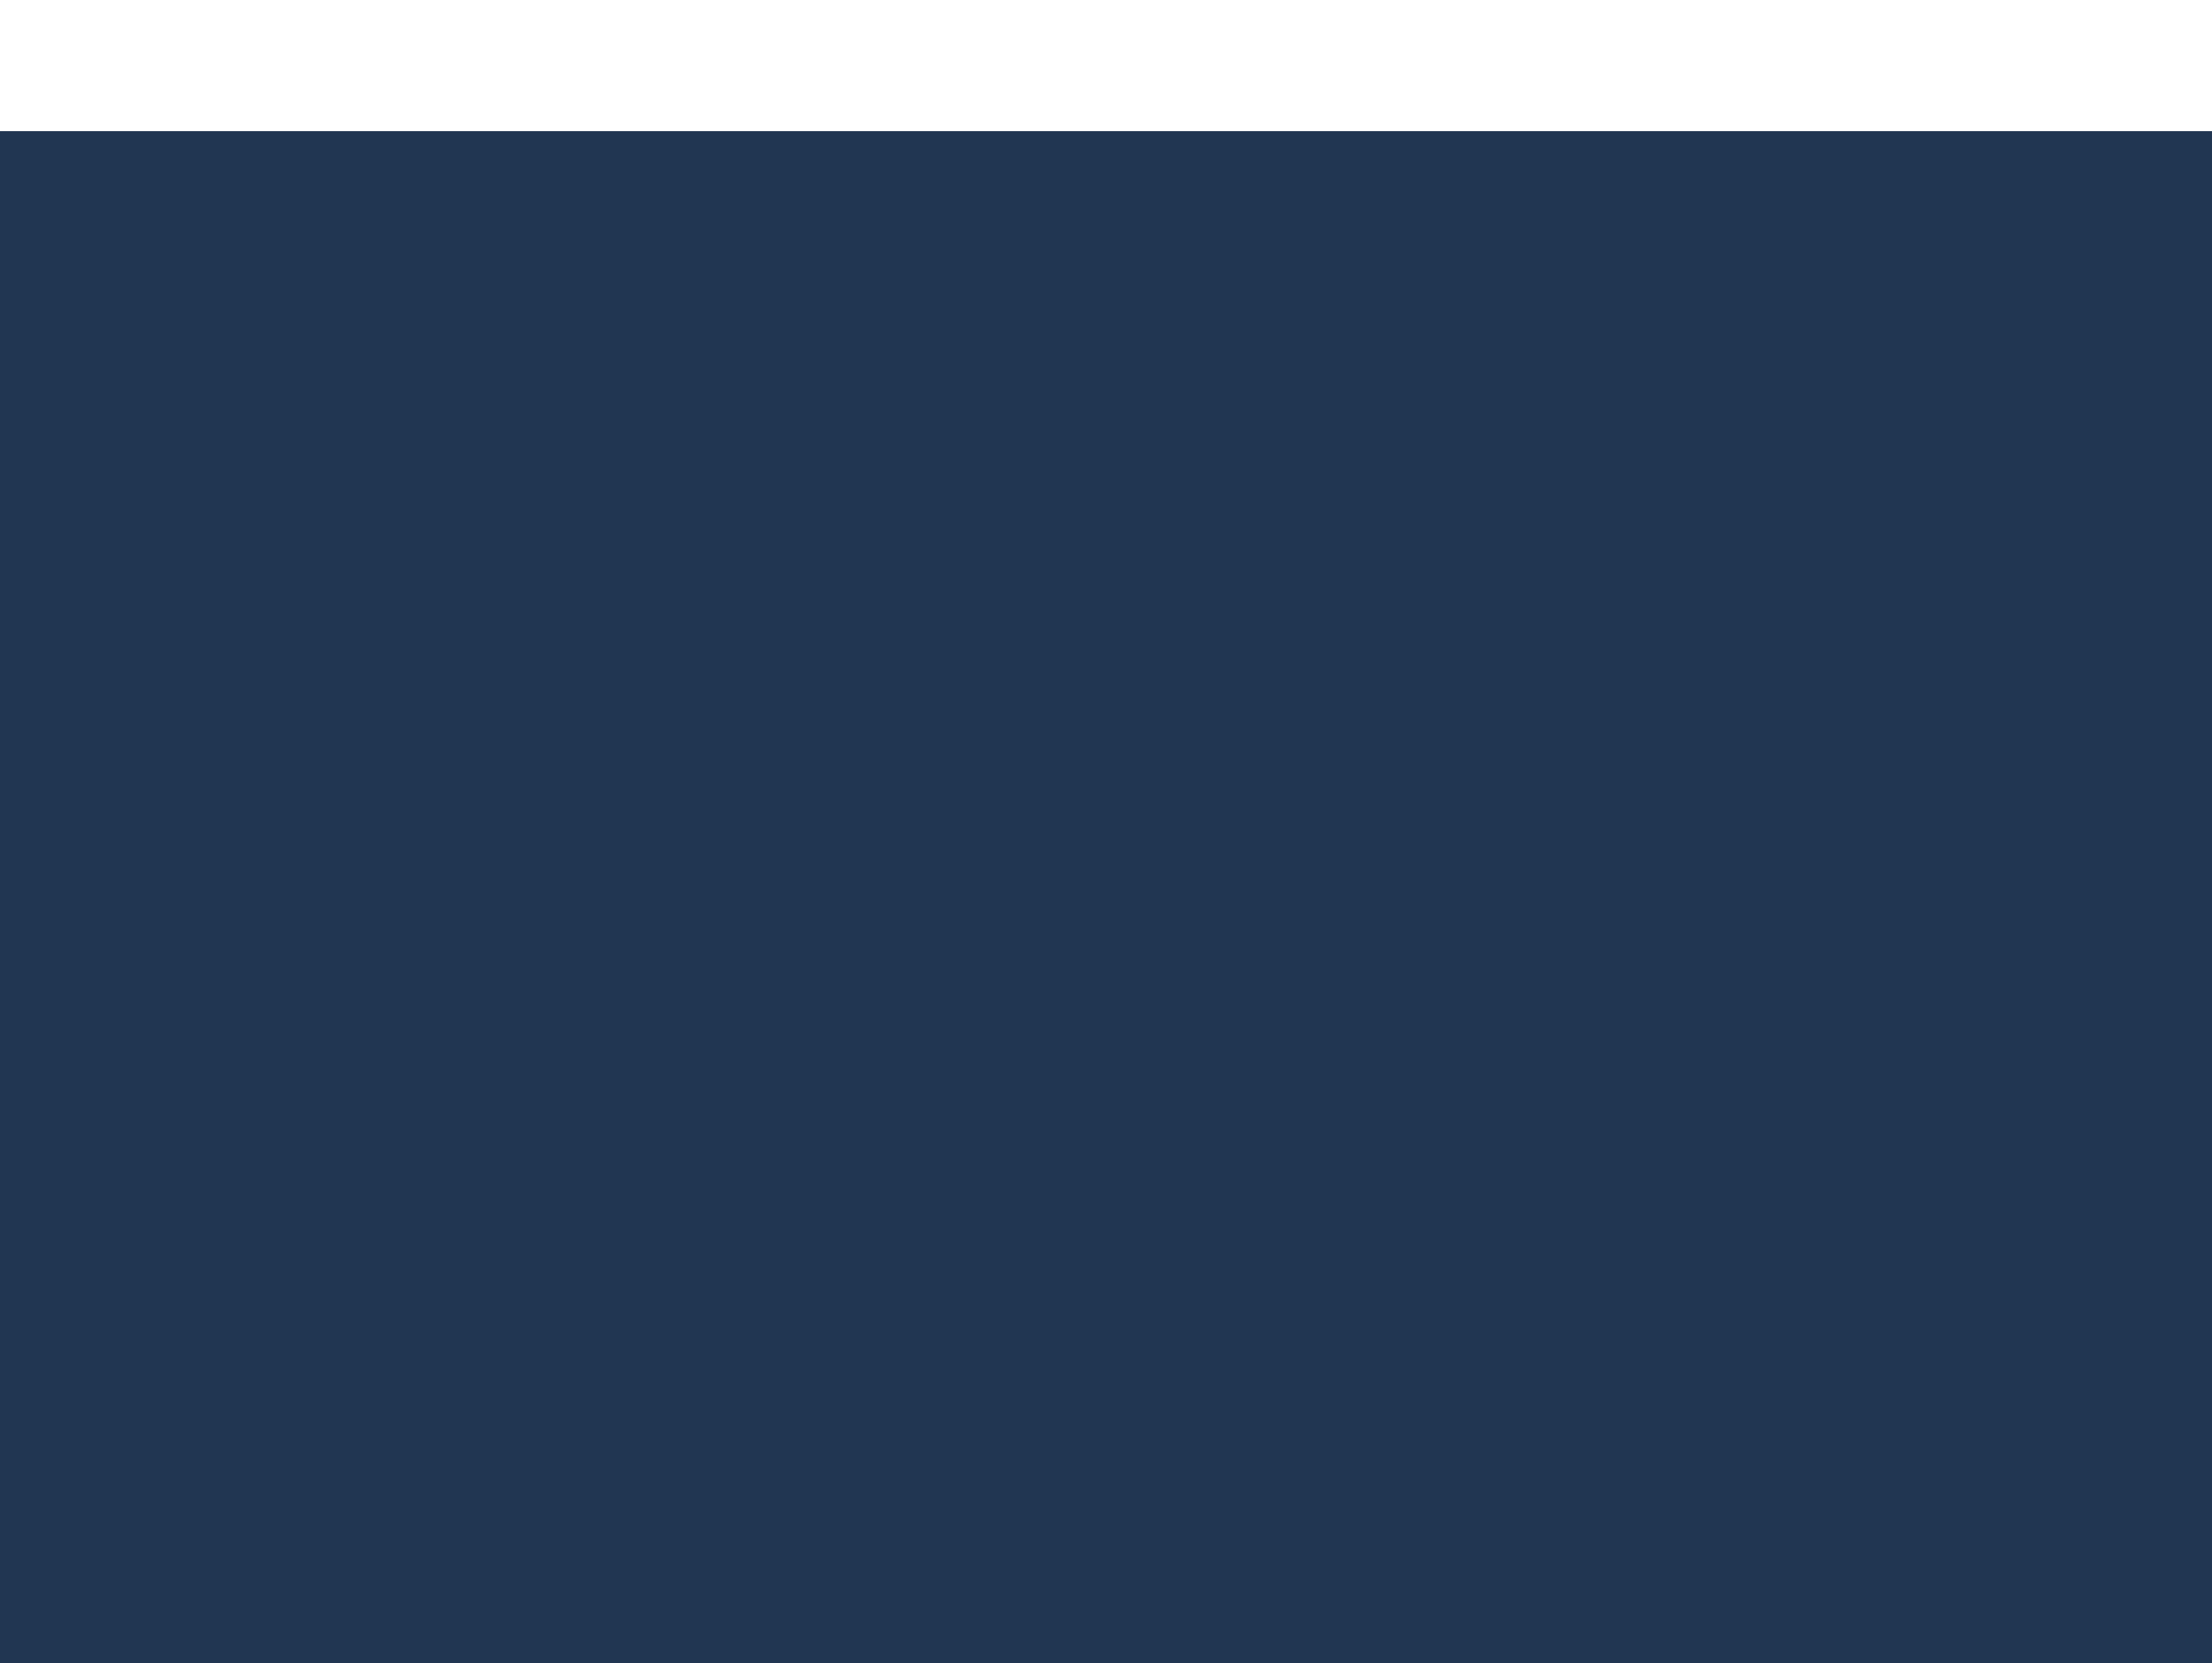

Supplement: 10914_2019_9489_MOESM1_ESM.pdf [file 10914_2019_9489_MOESM1_ESM.pdf]
